## 1 **High-throughput method to test antimicrobial gels against a multispecies oral biofilm**

2 Kanchana Chathoth<sup>1\*</sup>, Bénédicte Martin<sup>1</sup>, Martine Bonnaure-Mallet<sup>1,2</sup> and Christine Baysse<sup>1</sup>

3 \*Corresponding author: kanchana-nandan.chathoth@univ-rennes1.fr

4 <sup>1</sup> University Rennes 1, NUMECAN INSERM U1241, CIMIAD F-35043 Rennes, France

5 <sup>2</sup> CHU Pontchaillou, Rennes

6 **Keywords:** oral biofilm, antibacterial gels, *Porphyromonas gingivalis*, *Treponema denticola*,  
7 *Streptococcus gordonii*. oxygen

### 8 **ABSTRACT**

9       Periodontitis, characterized by the damage of the periodontium can eventually lead to  
10 tooth loss. Moreover, severe forms of periodontitis are associated with several systemic disorders.  
11 The evolution of the disease is linked to the pathogenic switch of the oral microbiota comprising  
12 of commensal colonizers and anaerobic pathogens. Treatment with antimicrobial gels has the  
13 potential to help eradicate periodontal pathogens. Testing antibacterial gels against *in vitro*  
14 biofilm models is complicated. Recovery of detached and sessile bacteria from *in vitro* biofilms  
15 treated with gel formulations using conventional methods (microtiter plates,  $\mu$ -slides, flow cells  
16 etc.) may prove arduous. To overcome this challenge, we optimised a simple method using the  
17 principle of the Calgary Biofilm Device (CBD) for testing antimicrobial gels against multispecies  
18 oral biofilms. First, we established three-species oral biofilms consisting of two periodontal  
19 pathogens (*Porphyromonas gingivalis*, *Treponema denticola*) and a primary colonizer of the  
20 dental plaque (*Streptococcus gordonii*) on the surface of pegs. Next, a protocol to test gels against  
21 oral biofilms was implemented using commercially available gels with different active products.  
22 This method enables the analysis of the composition of biofilm and detached/planktonic cells to  
23 measure the effect of topical gel formulations/antibacterial gels for the treatment of periodontitis.  
24 However, the method is not restricted to oral biofilms and can be adapted for other biofilm-  
25 related studies.

### 26 **INTRODUCTION**

27 Periodontitis is a polymicrobial chronic inflammatory disease of the periodontium caused by the  
28 accumulation of dental plaque (Pihlstrom *et al.*, 2005). It is regarded as the second most common

29 disease worldwide, with severe forms affecting up to 10 to 15% of adults (Petersen and Ogawa,  
30 2012) resulting in tooth loss. Many studies have reported an association of severe periodontitis  
31 with several systemic disorders (Beukers *et al.*, 2017; Bui *et al.*, 2019; Graves *et al.*, 2019;  
32 Hujoel *et al.*, 2003; Koziel *et al.*, 2014; López, 2008; Preshaw *et al.*, 2012) and oral malodor (Lee  
33 *et al.*, 2003; Yaegaki, 2008). Therefore, periodontal diseases are a major socio-economic  
34 concern.

35 Metagenomics analysis of the microbial community in the human subgingival plaque has  
36 revealed the presence of over 500 species (Ai *et al.*, 2017). This oral biofilm formation is initiated  
37 by early colonizers that recognize receptors in the acquired pellicle that coats the enamel of the  
38 tooth. These early colonizers consist mainly of facultative anaerobic Gram-positive bacteria such  
39 as *Streptococcus* spp. and *Actinomyces* spp. In the oral health-associated biofilm, these Gram-  
40 positive cocci and rods predominate. Change in dominant species with an increase of putative  
41 pathogens like *Porphyromonas gingivalis*, *Treponema denticola*, *Tannerella forsythia* and  
42 *Prevotella intermedia* results in dysbiosis and thus periodontal disease (Kolenbrander *et al.*,  
43 2002; Meuric *et al.*, 2017). The mechanism behind the shift from health-associated oral  
44 microbiota to periodontal pathogens is not clearly understood. This pathogenic shift is probably  
45 linked to the changes in the composition and/or virulence of microbiota as a result of changes in  
46 the oral environment (Pöllänen *et al.*, 2013). In our recent review (Chathoth *et al.*, 2020), we  
47 hypothesize that an excess of iron and the resultant ROS generated in presence of the  
48 peroxygenic streptococci may be one of the contributors for dysbiosis. Therefore, it is of interest  
49 to be able to access changes in biofilm composition in response to a treatment.

50 Antimicrobial agents in the form of gel formulations are a promising delivery system for the  
51 treatment of periodontitis *via* topical administration. The advantages include the ease of use,  
52 increased retention time at the site of application and controlled drug release. Several authors  
53 have demonstrated the effectiveness of gel formulations in reducing microbial content or plaque  
54 index (Figueiredo de Almeida Gomes *et al.*, 2006; Noyan *et al.*, 1997; Paquette *et al.*, 1997;  
55 Sauvêtre *et al.*, 1993) in human, animal-based or *in vitro* studies. Similar improvement in probing  
56 depth and/or bleeding was reported (Esposito *et al.*, 1996; Graça *et al.*, 1997) on use of gel  
57 formulations alone or in conjunction with other modes of treatment. There is an increasing  
58 interest in the use of biodegradable and biocompatible compounds like chitosan (İkinci *et al.*,

59 2002), poly(lactic-co-glycolic acid)/hyaluronic acid (Noda *et al.*, 2018), cranberry juice  
60 concentrate (H.R. *et al.*, 2017) in gel formulations. The non-toxic properties of such compounds  
61 combined with the advantages of gel as a delivery system is continuously explored as a treatment  
62 strategy.

63 Conventional methods for growing biofilms *in vitro* (microtiter plates,  $\mu$ -slides, flow cells etc.)  
64 pose several difficulties in testing antimicrobial gels against biofilms. The biofilm and the  
65 treatment ought to be in the same place. Owing to the viscosity and adhesive nature of gels, the  
66 recovery of detached and sessile bacteria for assessment after treatment gets complicated. The  
67 Minimum Biofilm Elimination Concentration (MBEC<sup>TM</sup>) Assay System (formerly the Calgary  
68 Biofilm Device) was previously challenged with gel-based products to assess their bactericidal  
69 activity on mono-species biofilm (Martineau and Dosch, 2007; Santos *et al.*, 2016). Hence, a  
70 method adapted to both gel-based products and polymicrobial biofilms, and capable of  
71 deciphering the behaviour of each species in response to the treatment was needed. In this study,  
72 we combined a method using the principle of the Calgary Biofilm Device (CBD) (Ceri *et al.*,  
73 1999) and a new medium for oral bacteria (Martin *et al.*, 2018) for testing antimicrobial gels  
74 against multispecies oral biofilms. This protocol using a lid with pegs and a 96-well microtiter  
75 plate was adapted to establish three-species oral biofilms on the surface of the pegs. The three  
76 species consisted of two key periodontal pathogens *P. gingivalis*, *T. denticola* and a primary  
77 colonizer of the dental plaque, *S. gordonii*. The basis for the selection of these microorganisms  
78 was the species-specific co-aggregation of *S. gordonii* with *P. gingivalis* (Lamont and  
79 Hajishengallis, 2015) and the syntrophy and synergy between *P. gingivalis* and *T. denticola*  
80 (Meuric *et al.*, 2013; Tan *et al.*, 2014; Zhu *et al.*, 2013). Moreover, *P. gingivalis* and *T. denticola*,  
81 co-exist in deep periodontal pockets (Kigure *et al.*, 1995; Kumawat *et al.*, 2016) and are  
82 associated with severe forms of periodontitis. *S. gordonii* is a peroxygenic bacteria and a  
83 glutathione producer that can also influence the pathogenic switch of the oral subgingival biofilm  
84 (Chathoth *et al.*, 2020). Most importantly, we use saliva-coated pegs to grow the three-species  
85 biofilm *in vitro* to mimic the dental plaque developing initially at the root of teeth. This biofilm  
86 was realised in the MMBC-3 medium which allows the growth of the three bacterial species  
87 (Martin *et al.*, 2018). The method was adapted to analyse the composition of the biofilm and  
88 detached planktonic growth in order to test topical gel formulations/antibacterial gels against oral  
89 biofilms for the treatment of periodontitis.

90 The method was challenged with two commercial gels, Hyalugel<sup>®</sup>-ADO (Ricerfarma, Milan,  
91 Italy) and blue<sup>®</sup>m oral gel (blue<sup>®</sup>m Europe B.V., Netherlands). Hyalugel<sup>®</sup>-ADO mainly consists  
92 of hyaluronic acid (0.2 %) which is a major component of the extracellular matrix of the skin and  
93 plays a vital role in skin repair (Neuman *et al.*, 2015). Hyaluronic acid showed an antibacterial  
94 activity against both planktonic bacteria and biofilms (Ardizzoni *et al.*, 2011; Binshabaib *et al.*,  
95 2020; Eick *et al.*, 2013; Pirnazar *et al.*, 1999). The main ingredients of the blue<sup>®</sup>m oral gel are  
96 sodium perborate (1.72 %) and lactoferrin (0.2 %). Sodium perborate acts as the oxygen donor  
97 that can be lethal to the anaerobic periodontal pathogens. Lactoferrin has antimicrobial, anti-  
98 inflammatory and anti-carcinogenic properties and also acts as an iron chelator (Wang *et al.*,  
99 2019). Previous reports have demonstrated that blue<sup>®</sup>m oral gel reduced *P. gingivalis* planktonic  
100 growth (Deliberador *et al.*, 2020) and also showed antiplaque and anti-gingivitis efficacy in the  
101 form of a toothpaste (Cunha *et al.*, 2019).

## 102 **METHODS**

### 103 **Strains and media**

104 Strains of *Streptococcus gordonii* Challis DL1 (Chen *et al.*, 2004), *Porphyromonas gingivalis*  
105 TDC60 (Watanabe *et al.*, 2011) and *Treponema denticola* ATCC35405 (Chan *et al.*, 1993) were  
106 used for the study. The cultures of *S. gordonii* and *P. gingivalis* were grown in MMBC-3  
107 (Medium for Mixed Bacterial Community), with FeSO<sub>4</sub>.7H<sub>2</sub>O<sub>2</sub> (Sigma-Aldrich) at 8 µM and  
108 protoporphyrin IX (PPIX, Sigma-Aldrich) at 0.08 µM as the iron source (Martin *et al.*, 2018). *T.*  
109 *denticola* was initially grown in NOS spirochete medium (Leschine and Canale-Parola, 1980) and  
110 further sub-cultured in MMBC-3 supplemented with FeSO<sub>4</sub>.7H<sub>2</sub>O<sub>2</sub> (8 µM) and PPIX (0.08 µM).  
111 All three micro-organisms were grown in anaerobic condition at 37°C in an anaerobic chamber  
112 (MACS 500, Don Whitley Scientific, United Kingdom) with 10% v:v H<sub>2</sub>, 10% v:v CO<sub>2</sub> and  
113 80% v:v N<sub>2</sub>.

### 114 **Growth and treatment of the biofilm**

115 The protocol for the growth and treatment of the biofilm is detailed in Figure 1. As the first step,  
116 200 µl of saliva (Pool Human Donors, MyBioSource), filtered (0.20 µm) and diluted twice in  
117 sterile distilled water, was added into the Nunc<sup>™</sup> Nunclon<sup>™</sup> 96-well tissue culture microtiter  
118 plates. The lid with pegs (Nunc-TSP, polystyrene) was placed over the microtiter plate and

119 incubated in saliva for 30 minutes. Next, the saliva was replaced by 200  $\mu$ l of inoculum  
120 consisting of *S. gordonii* (OD<sub>600nm</sub>:0.05), *P. gingivalis* (OD<sub>600nm</sub>:0.1) and *T. denticola*  
121 (OD<sub>600nm</sub>:0.1) in a new microtiter plate. The lid with pegs was placed on the microtiter plate  
122 ensuring that the pegs were immersed in the inoculum. This set-up was incubated in anaerobic  
123 conditions for 6 hours. Meanwhile, the challenge plate consisting of the two gel treatments and  
124 MMBC-3 was prepared in a new microtiter plate in aerobic condition by adding 150  $\mu$ l of each of  
125 the treatments and the medium in individual wells of the 96-well microtiter plate with the aid of 1  
126 ml syringes. The 6-hour three-species biofilms or adherent cells present on the surface of the pegs  
127 were subjected to either MMBC-3 or Hyalugel<sup>®</sup>-ADO or blue<sup>®</sup>m oral gel for 1 hour in anaerobic  
128 condition. After the 1-hour treatment, the pegs were carefully lifted from the challenge plate and  
129 further incubated in the microtiter wells containing 200  $\mu$ l of MMBC-3 for 24 hours in anaerobic  
130 conditions. After the 24-hour incubation, the 96-well microtiter plate comprised of bacteria that  
131 detached (as a consequence of either the treatment or biofilm formation on the pegs) and  
132 proliferated in planktonic form in the well. The pegs consisted of biofilm formed either due to the  
133 bacteria remaining on its surface post-treatment or the biofilm build-up due to the planktonic  
134 bacteria in the wells of the microtiter plate. Both samples (detached/planktonic cells and biofilm)  
135 are representative of the effectiveness of the treatment.

136 The detached/planktonic cells were collected from the microtiter plate and the biofilm were  
137 collected from the surface of the pegs by sonication (30 min) and were quantified by qPCR. 6  
138 pegs (2 per condition) were broken with the help of pliers and stained with Syto<sup>®</sup>9 for  
139 visualization using confocal laser microscopy.

#### 140 **Confocal microscopy and imaging**

141 Treated and untreated biofilm-containing pegs after a 24-hour incubation in MMBC-3 were  
142 subjected to microscopic imaging after staining with 5  $\mu$ M of Syto<sup>®</sup>9 green-fluorescent nucleic  
143 acid stain (Invitrogen, ThermoFisher Scientific) diluted in PBS. Briefly, 6 pegs were broken  
144 anaerobically from the lid with the help of sterile pliers and were placed in a microtiter plate  
145 containing the stain (200  $\mu$ l) for 20 min. They were further transferred to Syto<sup>®</sup>9 stain-filled (200  
146  $\mu$ l)  $\mu$ -slides (8 chambered coverslip, ibiTreat, ibidi) anaerobically. The biofilm on the surface of  
147 the stained pegs was then observed *in situ* with a Leica TCS-SP5 confocal laser scanning  
148 microscope (Leica Microsystems, Wetzlar, Germany). An HC PL Apo 10X, 0.4 NA oil

149 immersion objective lens was used for image capture and a numerical zoom of 2 was applied.  
150 The 488-nm UV diode and a 485 to 500-nm band-pass emission filter were used to detect all  
151 bacteria stained with Syto<sup>®</sup>9. Biofilm stacks (123 × 123 μm) acquired at 1 μm intervals were  
152 scanned with a line average of 2. Also, zoomed images were captured using HC PL Apo 63X, 1.4  
153 NA oil immersion objective lens with a numerical zoom of 5.05.

154 Leica software (LAS AF V.2.2.1) was used for microscope piloting and image acquisition.  
155 Analysis of images based on Syto<sup>®</sup>9 was performed in ImageJ software V1.43m (National  
156 Institute of Health, USA) to obtain the maximum z-projection of the images.

### 157 **Quantification of bacteria by qPCR**

158 The bacteria, consisting of *S. gordonii*, *P. gingivalis* and *T. denticola*, in the initial inoculum and  
159 the planktonic/detached cells collected after treatment were centrifuged (8000xg, 20°C, 10 min)  
160 and the pellets were resuspended in 150 μl of Lysis buffer (20 mg/ml lysozyme in 20 mM Tris-  
161 HCl, 2 mM EDTA, 1.2 % Triton X, PBS, pH 8). Biofilms were collected in 150 μl Lysis buffer  
162 by sonication for 30 min using a water bath sonicator (Ultrasonic cleaner). The biofilm collected  
163 from 3 pegs from the same condition (treated or untreated) were pooled together to increase the  
164 sample volume and to compensate for the low biofilm surface area on the pegs (approximately 44  
165 mm<sup>2</sup> per peg) (Harrison *et al.*, 2010; MBEC assay procedural manual, version 2.0, Innovotech).  
166 All samples were subjected to DNA extraction using QIAamp DNA Mini kit (Qiagen) according  
167 to the manufacturer's instructions with slight modification i.e. the lysis using proteinase K was  
168 performed overnight.

169 Quantitative PCR was performed in a total reaction volume of 12.5 μl containing 6 μl Takyon<sup>™</sup>  
170 Low Rox SYBR<sup>®</sup> MasterMix dTTP Blue (Eurogentec), 0.5 μl of each primer (5μM), and 1 μl of  
171 the sample. Amplification of the extracted DNA template was performed in QuantStudio<sup>™</sup> 7  
172 Flex Real-Time PCR System (Applied Biosystems) by initial incubation of 2 min at 55°C and 10  
173 min at 95°C, followed by 40 cycles of 15 sec at 95°C and 1 min at 60°C. A melt curve stage was  
174 performed consisting of 15 sec at 95°C followed by a temperature gradient from 60°C to 95° C  
175 with fluorescence measured in an increment of 1°C every 15 sec.

176 The concentrations of the DNA samples were determined in comparison with the defined  
177 concentrations of DNA standards set in the range of 0.0001 to 10 ng with purified genomic DNA

178 from each of the three species. Primers used were specific to each species targeting the 16S  
179 ribosomal RNA taking into account specific genome weights ( $2.58 \times 10^{-6}$  ng for *P. gingivalis*,  
180  $3.12 \times 10^{-6}$  ng for *T. denticola* and  $2.41 \times 10^{-6}$  ng for *S. gordonii*) (Ammann *et al.*, 2013; Martin  
181 *et al.*, 2017). The primers used in this study are listed in Table 1.

## 182 **Statistical analysis**

183 All the experiments were done with 3 biological and 3 technical replicates. Statistical analysis  
184 was performed using the two-tailed unpaired student t-test and a p-value of less than 0.05 was  
185 considered statistically significant.

## 186 **RESULTS**

### 187 **Establishment of the three-species oral biofilm on the peg-lid using MMBC-3 medium**

188 The method of using Nunc-TSP lids with pegs allowed the formation and growth of the three-  
189 species oral biofilm on the surface of the pegs. Using this method, biofilm that formed on the peg  
190 surface after 31 hours (6 hours of growth prior to treatment + 1 hour of treatment + 24 hours of  
191 post-treatment growth, see methods and Figure 1) in MMBC-3 medium were quantified by qPCR  
192 (Figure 3A) and visualized by confocal fluorescent microscopy (Figure 2A and D). The  
193 microscopic images are representative of the total biofilm density and do not differentiate  
194 individual species. However, it enables the visualization of clusters of bacteria (Figure 2D) when  
195 zoomed. Additionally, the planktonic or detached bacteria in the 96-well microtiter plate were  
196 also quantified by qPCR (Figure 3A). The concentration of each species (*S. gordonii*, *P.*  
197 *gingivalis* and *T. denticola*) in the biofilm (Figure 3B) and planktonic/ detached condition (Figure  
198 3C) were also measured.

199 The three-species biofilm quantified on the surface of the untreated pegs (3 pegs pooled together)  
200 is  $2.08 \times 10^7$  CFU/ml (Figure 3A). This value corresponds to  $1.5 \times 10^5$  CFU/mm<sup>2</sup> (as the growth  
201 area per peg is 44 mm<sup>2</sup>). Martin *et al.*, (2018), in another study using the same species and  
202 medium reported biofilm formation of approximately  $1 \times 10^{10}$  CFU/ml in conventional  $\mu$ -slides.  
203 This value corresponds to  $1 \times 10^8$  CFU/mm<sup>2</sup> (as the growth area of each well in a  $\mu$ -slides is 100  
204 mm<sup>2</sup>). The concentration of the biofilm (in CFU/mm<sup>2</sup>) on the surface of the pegs is 650 times  
205 lesser than the concentration of biofilm on  $\mu$ -slides. This difference is as expected since the pegs  
206 and  $\mu$ -slides vary in structure and surface area. Also, conventional methods (like  $\mu$ -slides) for

207 biofilm formation pose the concerns of aggregation linked to sedimentation of bacteria in the  
208 wells. However, this concern can be disregarded in the case of peg-lids due to its protruding  
209 topology. Even though the concentration of bacteria in the biofilm on the surface of the pegs is  
210 less in comparison to conventional methods, it is still detectable by qPCR (in the species level)  
211 (Figure 3B) and can also be visualized by confocal microscopy (Figure 2A and D).

212 At the species level, the biofilm on the peg surface contains 99.2 % *S. gordonii*, 0.5 % *P.*  
213 *gingivalis* and 0.4 % *T. denticola* (Figure 4A). The composition of each species in the biofilm in  
214 conventional  $\mu$ -slides (Martin *et al.*, 2018) is approximately 98.1 % *S. gordonii*, 1.3 % *P.*  
215 *gingivalis* and 0.6 % *T. denticola*. This ensures that even though the concentration of the biofilm  
216 is far less on the peg surface in comparison to  $\mu$ -slides, it does not have a major effect on the  
217 overall composition (or ratio) of individual species for identical inocula. *S. gordonii* is seen to  
218 always predominate the population in the case of both peg-lids and  $\mu$ -slides. This predominance  
219 of *S. gordonii* is also observed in the case of planktonic growth (Figure 4B). Further, on  
220 considering the sum of the bacteria in the biofilm and the detached (or planktonic) form as the  
221 total bacteria, we observe that a majority of bacteria remain in the planktonic form for all three  
222 species (Table 2).

223 This method thus enabled the establishment of an oral biofilm model consisting of a facultative  
224 anaerobic commensal and two anaerobic pathogens on the surface of the pegs. It further allowed  
225 the analysis of the composition and quantification of each species in the biofilm and planktonic  
226 form. The use of the parameters described above will permit the comparison between various  
227 antibacterial gels against an oral biofilm model.

### 228 **Effect of antibacterial gels against a 6-hour three-species oral biofilm model**

229 Next, in order to validate this method (Figure 1) on gel formulations, we tested the effect of two  
230 commercially available gels, namely, Hyalugel<sup>®</sup>-ADO and blue<sup>®</sup>m oral gel on the 3-species 6-  
231 hour biofilm established using MMBC-3 on the surface of the pegs. The two gels have  
232 comparable viscosities, 35000-60000 cP for Hyalugel<sup>®</sup>-ADO, and 25000-50000 cP for blue<sup>®</sup>m  
233 oral gel, as given by respective manufacturers. No gel without potential active compound was  
234 available to discriminate between the effect of viscosity and the effect of the active compound.  
235 Therefore, the method used evaluated both parameters against oral biofilm and enabled the  
236 comparison of gels with comparable viscosity.



237 The method allowed us to assess the number of sessile and planktonic bacteria remaining after  
238 treatment. We could also identify the most impacted species amongst a mixed biofilm. Focusing  
239 on the two gels used to implement the method, the concentration of the total bacteria was  
240 significantly reduced from  $4.11 \times 10^9$  CFU/ml to  $5.15 \times 10^6$  CFU/ml after treatment of the 6-hour  
241 three-species biofilm with Hyalugel<sup>®</sup>-ADO in comparison to MMBC-3 (Figure 3A). The  
242 decrease is evident in the concentration of bacteria in the biofilm as well as the concentration of  
243 bacteria in the detached/planktonic form. A similar trend was observed in the case of blue<sup>®</sup>m oral  
244 gel with total number of bacteria decreasing from  $4.11 \times 10^9$  CFU/ml to  $1.50 \times 10^7$  CFU/ml when  
245 compared to MMBC-3. The treatment with blue<sup>®</sup>m oral gel showed a decrease in the  
246 concentration of bacteria in the biofilm but an increase in detached/planktonic cells when  
247 compared to the treatment with Hyalugel<sup>®</sup>-ADO (Figure 3A). The blue<sup>®</sup>m oral gel showed  
248 greater efficiency in decreasing the concentration of bacteria in the biofilm when compared to  
249 Hyalugel<sup>®</sup>-ADO (Figure 3A). This decrease in biofilm concentration from MMBC-3 to  
250 Hyalugel<sup>®</sup>-ADO to blue<sup>®</sup>m oral gel is also evident in the microscopic images (Figure 2A, B, C).

251 The method used was efficient to monitor the variations in the concentration of each species after  
252 treatment. In the present protocol used to implement the method, the concentration of bacteria in  
253 the biofilm decreased significantly in the case of *S. gordonii* and *T. denticola* from MMBC-3 to  
254 Hyalugel<sup>®</sup>-ADO to blue<sup>®</sup>m oral gel while no effect of the two gels was seen on *P. gingivalis*  
255 (Figure 3B). Alternately, the concentration of *S. gordonii* and *P. gingivalis* in the  
256 detached/planktonic form, post-treatment with Hyalugel<sup>®</sup>-ADO decreased significantly in  
257 comparison to MMBC-3 (Figure 3C). No effect of Hyalugel<sup>®</sup>-ADO in comparison to MMBC-3  
258 was observed on the concentration of *T. denticola* in the detached/planktonic form. In contrast,  
259 post-treatment with blue<sup>®</sup>m oral gel, the concentration of detached/planktonic *P. gingivalis* and *T.*  
260 *denticola* significantly increased in comparison to MMBC-3, while that of *S. gordonii* decreased.  
261 Also, the treatment with blue<sup>®</sup>m oral gel showed a higher concentration of all three species in the  
262 detached/planktonic form when compared to treatment with Hyalugel<sup>®</sup>-ADO.

263 Therefore, this method permitted the analysis of the effect of treatment on the composition of the  
264 biofilm and planktonic cultures. The percentage of *S. gordonii* in the antibacterial gel-treated  
265 (Hyalugel<sup>®</sup>-ADO and blue<sup>®</sup>m oral gel) biofilms decreased in comparison to untreated biofilm  
266 (MMBC-3) while the percentage of *P. gingivalis* and *T. denticola* increased post-treatment

267 (Figure 4A). However, the ratio of the three species in the biofilm remained similar between the  
268 two treatments. The percentage of detached/planktonic *S. gordonii* decreased from untreated to  
269 treated biofilms, the least percentage being in the case of blue<sup>®</sup> m oral gel (Figure 4B). As a  
270 result, the percentage of the planktonic form of *P. gingivalis* and *T. denticola* increased post-  
271 treatment when compared to untreated biofilms. The percentage of planktonic *P. gingivalis* is  
272 higher in the case of blue<sup>®</sup> m oral gel-treated biofilms while the percentage of planktonic *T.*  
273 *denticola* is similar between the two treatments.

274 Finally, using this method, it is possible to evaluate the effect of treatment on the distribution  
275 between sessile and planktonic cells for each species. The species-wise percentage of biofilm and  
276 detached planktonic cells post-treatment with the gels in comparison to MMBC-3 was evaluated,  
277 where 100% constituted the sum of the percentages of bacteria in the biofilm and the detached  
278 planktonic form. The percentage of biofilm post-treatment with Hyalugel<sup>®</sup>-ADO in comparison  
279 to MMBC-3, was higher in the case of *S. gordonii* and *P. gingivalis* while lower in the case of *T.*  
280 *denticola*. Treatment with blue<sup>®</sup> m oral gel only modified and increased the percentage of *S.*  
281 *gordonii* in the biofilm in comparison to untreated biofilms. The percentage of planktonic  
282 bacteria was significantly reduced in the case of *S. gordonii* between untreated and treated  
283 biofilms (from 99.6 % for MMBC-3 to 96.4 % for blue<sup>®</sup> m oral gel to 84.8 % for Hyalugel<sup>®</sup>-  
284 ADO). For planktonic form of *P. gingivalis* a reduction was observed when Hyalugel<sup>®</sup>-ADO-  
285 treated biofilms were compared to MMBC-3 (from 65.0 % for MMBC-3 to 48.4 % for  
286 Hyalugel<sup>®</sup>-ADO). However, an increase in the percentage of planktonic form of *P. gingivalis* was  
287 observed in the case of blue<sup>®</sup> m oral gel-treatment as compared to Hyalugel<sup>®</sup>-ADO and MMBC-3.  
288 Also, an increase in the percentage of planktonic form of *T. denticola* was seen after gel  
289 treatment (from 87.2 % for MMBC-3 to 94.3 % for to Hyalugel<sup>®</sup>-ADO to 99.3 % for blue<sup>®</sup> m oral  
290 gel).

291 In short, the method was therefore efficient to determine the specific effect of both treatments on  
292 the oral biofilm: Hyalugel<sup>®</sup>-ADO (containing 0.2 % hyaluronic acid), reduced the planktonic  
293 growth of *S. gordonii* and *P. gingivalis* while it did not affect planktonic growth of *T. denticola*.  
294 This is in agreement with previously reported results (Ardizzoni *et al.*, 2011; Pirnazar *et al.*,  
295 1999). Further, Hyalugel<sup>®</sup>-ADO reduced the biofilm formation of *S. gordonii* and *T. denticola*  
296 but did not affect the biofilm growth of *P. gingivalis* when compared to untreated biofilms.

297 blue<sup>®</sup>m oral gel in comparison to untreated biofilms, reduced the overall growth of *S. gordonii*,  
298 increased the detached planktonic growth of *P. gingivalis* and *T. denticola* and reduced the  
299 biofilm growth of *S. gordonii* and *T. denticola*.

## 300 **DISCUSSION**

301 Traditional methods for the development of biofilms (like microtiter plates,  $\mu$ -slides, Ludin  
302 chambers etc.) can pose difficulties in testing the antimicrobial effect of gels against biofilms. In  
303 this study, we developed a high throughput method to test antibacterial gels against multispecies  
304 oral biofilm. This method uses the principle of the Calgary Biofilm Device to grow biofilms and  
305 was adapted for the growth of multispecies biofilm consisting of oral bacteria. We used the  
306 MMBC-3 (Martin *et al.*, 2018) as the growth medium especially designed for the growth of the  
307 three species used in this study. We use an apparatus/arrangement consisting of a 96-well  
308 microtiter plate and a lid with pegs. With the help of the microtiter plate, biofilms are established  
309 on the surface of the pegs. These biofilms are further challenged with antibacterial gels to test the  
310 effect of these gels against the oral biofilm model. Our method resolves the concerns posed by  
311 conventional methods by growing the biofilm on pegs while preparing the treatment in a  
312 microtiter plate. The separation of the treatment from the biofilm is thus not needed. We have  
313 devised a means of analyzing the effect of the treatment by further incubating the treated biofilm  
314 in a fresh microtiter plate containing medium (MMBC-3). Here, we assess the ability of the  
315 bacteria in the treated biofilm to further grow as biofilm (on the peg-surface) or planktonic  
316 culture (in the microtiter plate) in the MMBC-3 medium. Briefly, our method nullifies the need  
317 for separation of bacteria (either in biofilm or planktonic form) from the treatment/gel while it  
318 also allows the analysis of each species in the biofilm and planktonic form post-treatment. It is  
319 known that gels have an inherent shear force due to their viscous and adhesive nature which can  
320 result in the removal of bacteria from the surface of the pegs. In this study, to test the method, we  
321 compare the efficiency of two commercially available gels (with comparable viscosity) in biofilm  
322 reduction as a combined effect of its inherent shear force and its respective active compounds and  
323 against untreated biofilms.

324 The reduction in the biofilm in comparison to untreated biofilms may be due to the combined  
325 effect of the active antimicrobial compound (hyaluronic acid, sodium perborate or lactoferrin)  
326 and the viscous nature of gels. It cannot be excluded that since the 6-hour biofilm is scanty, its

327 removal from the peg surface is enabled by the inherent viscous/adhesive nature of the gel. The  
328 method allowed us to compare two treatments with comparable viscosity. Here, blue<sup>®</sup> m oral gel  
329 induced higher concentration of the three species as planktonic cells while lower *S. gordonii* and  
330 *T. denticola* concentrations in the biofilm, compared to Hyalugel<sup>®</sup>-ADO. The difference may be  
331 due to active compounds as both gels have comparable viscosity. The oxygen donor present in  
332 blue<sup>®</sup> m oral gel may have an effect on the obligate anaerobe *T. denticola* or boost the  
333 peroxygenic activity of *S. gordonii* and change the biofilm behaviour (Chathoth *et al.*, 2020).  
334 Lactoferrin of blue<sup>®</sup> m oral gel can reduce the initial attachment of *S. gordonii* (Arslan *et al.*,  
335 2009). This may explain the decrease in *S. gordonii* in blue<sup>®</sup> m oral gel-treated biofilms.

336 Our method demonstrated the ability of both gels in the reduction of the overall biofilm growth in  
337 comparison to untreated biofilm. They were especially effective in reducing *S. gordonii* and *T.*  
338 *denticola* in the biofilm. *S. gordonii* along with 16 other genera, has been previously classified  
339 under ‘signatures of dysbiosis’ due to its predominance in patients with periodontitis and  
340 edentulism (Hunter *et al.*, 2016). Also, its role in co-aggregation and metabolic interactions with  
341 other periodontal pathogens is well-known (Hajishengallis and Lamont, 2016; Sakanaka *et al.*,  
342 2015). On the other hand, *T. denticola*, a member of the red complex, is known for its metabolic  
343 symbiosis, co-aggregation and synergy with the keystone pathogen *P. gingivalis* (Ito *et al.*, 2010;  
344 Meuric *et al.*, 2013; Ng *et al.*, 2019). Hence, the reduction of *S. gordonii* and *T. denticola* in the  
345 oral biofilm model with a single treatment for 1 hour with either of the two gels is indeed a  
346 promising result. Both the gels have the potential of preventing oral dysbiosis and co-aggregation  
347 of periodontal pathogens. Hence multiple exposures/treatments per day with either of the two  
348 gels is likely to show better efficacy in the reduction of the dental plaque.

## 349 **CONCLUSION**

350 Antimicrobial gels are a promising treatment and can additionally be used as dressings and fillers,  
351 particularly in periodontal pockets, where the pathogenic oral biofilm resides. This study  
352 describes the method of using peg-lids for testing antimicrobial gels on multispecies biofilms. It  
353 offers the possibility of simultaneous testing of multiple conditions with reproducible cell density  
354 (Goeres *et al.*, 2005). It eliminates concerns due to sedimentation of bacteria (which is possible in  
355 the case of conventional methods). The method presented in this study has been optimized for the  
356 growth and development of oral biofilms in an iron-controlled medium. The effect of gels against

357 the oral biofilms is measured by analyzing the concentration of bacteria in the biofilm or  
358 planktonic form across treatments in comparison to the untreated biofilms. Another parameter  
359 that is assessed is the ratio of each species in the biofilm and planktonic form. Further, the ratio  
360 of the bacteria in the biofilm to the planktonic form is also evaluated to understand the effect of  
361 the treatment in comparison to untreated condition. Finally, the treated biofilms after incubation  
362 in MMBC-3 for 24 hours is also subjected to confocal laser microscopy to visualize the effect of  
363 the treatments on the biofilms. However, the number of the live and dead bacteria in the biofilm  
364 and planktonic growth after the treatments can be assessed to further optimize the method  
365 (Harrison *et al.*, 2007). Therefore, we will know if the antibacterial gels are bacteriostatic or  
366 bactericidal in action. Assays with various times of incubation of the biofilms prior to treatment  
367 can also be performed to model different pathogenic states. This method can be further adapted  
368 for other studies like testing antibacterial compounds (other than gels) against biofilms. Besides,  
369 biofilms other than oral biofilms can also be grown and studied using this method.

#### 370 **FUNDING SOURCE**

371 This work was supported by the Conseil Régional de Bretagne, France (F3/48 CPER), the  
372 Fondation “Les Gueules Cassées/Sourire Quand Même” and the Federative Research Structure  
373 Biosit (Rennes).

#### 374 **AUTHOR STATEMENT**

375 The study was designed by KC, BM and CB; experiments were performed by KC; the data was  
376 analysed by KC, BM and CB; the manuscript was written and edited by KC, BM, MBM and CB.

#### 377 **DECLARATION OF COMPETING INTEREST**

378 The authors declare no competing interests.

#### 379 **ACKNOWLEDGEMENTS**

380 We thank blue<sup>®</sup>m Europe B.V., Netherlands for sending us their product- blue<sup>®</sup>m oral gel, for  
381 this study and for product-related information. We also thank the manufacturer of Hyalugel<sup>®</sup>-  
382 ADO, Ricerfarma (Milan, Italy) and the distributor, Laboratoire COOPER, Melun, France, for  
383 providing the product-related information. Our sincere gratitude to the Microscopy Rennes  
384 Imaging Center (Biosit) for their technical assistance for the microscopy experiments.

## 385 REFERENCES

- 386 Ai, D., Huang, R., Wen, J., Li, C., Zhu, J., and Xia, L.C. (2017). Integrated metagenomic data  
387 analysis demonstrates that a loss of diversity in oral microbiota is associated with periodontitis.  
388 *BMC Genomics* 18, 1041. DOI: 10.1186/s12864-016-3254-5.
- 389 Ammann, T.W., Bostanci, N., Belibasakis, G.N., and Thurnheer, T. (2013). Validation of a  
390 quantitative real-time PCR assay and comparison with fluorescence microscopy and selective  
391 agar plate counting for species-specific quantification of an *in vitro* subgingival biofilm model. *J*  
392 *Periodontal Res.* 48, 517–526. DOI: 10.1111/jre.12034.
- 393 Ardizzoni, A., Neglia, R.G., Baschieri, M.C., Cermelli, C., Caratozzolo, M., Righi, E., Palmieri,  
394 B., and Blasi, E. (2011). Influence of hyaluronic acid on bacterial and fungal species, including  
395 clinically relevant opportunistic pathogens. *J Mater Sci Mater Med.* 22, 2329–2338. DOI:  
396 10.1007/s10856-011-4408-2.
- 397 Arslan, S.Y., Leung, K.P., and Wu, C.D. (2009). The effect of lactoferrin on oral bacterial  
398 attachment. *Oral Microbiol Immunol.* 24, 411–416. DOI: 10.1111/j.1399-302X.2009.00537.x.
- 399 Beukers, N.G.F.M., Heijden, G.J.M.G. van der, Wijk, A.J. van, and Loos, B.G. (2017).  
400 Periodontitis is an independent risk indicator for atherosclerotic cardiovascular diseases among  
401 60174 participants in a large dental school in the Netherlands. *J Epidemiol Community Health*  
402 71, 37–42. DOI: 10.1136/jech-2015-206745.
- 403 Binshabaib, M., Aabed, K., Alotaibi, F., Alwaqid, M., Alfraidy, A., and Alharthi, S. (2020).  
404 Antimicrobial efficacy of 0.8% Hyaluronic Acid and 0.2% Chlorhexidine against  
405 *Porphyromonas gingivalis* strains: An in-vitro study. *Pak J Med Sci* 36, 111–114. DOI:  
406 10.12669/pjms.36.2.1456.
- 407 Bui, F.Q., Almeida-da-Silva, C.L.C., Huynh, B., Trinh, A., Liu, J., Woodward, J., Asadi, H., and  
408 Ojcius, D.M. (2019). Association between periodontal pathogens and systemic disease. *Biomed J.*  
409 42, 27–35. DOI: 10.1016/j.bj.2018.12.001.
- 410 Ceri, H., Olson, M.E., Stremick, C., Read, R.R., Morck, D., and Buret, A. (1999). The Calgary  
411 Biofilm Device: New Technology for Rapid Determination of Antibiotic Susceptibilities of  
412 Bacterial Biofilms. *J Clin Microbiol.* 37, 1771–1776. DOI: 10.1128/JCM.37.6.1771-1776.1999.
- 413 Chan, E.C.S., Siboo, R., Keng, T., Psarra, N., Hurley, R., Cheng, S.-L., and Iugovaz, I. (1993).  
414 *Treponema denticola* (ex Brumpt 1925) sp. nov., nom. rev., and Identification of New Spirochete  
415 Isolates from Periodontal Pockets. *Int J Syst Bacteriol.* 43, 196–203. DOI: 10.1099/00207713-43-  
416 2-196.
- 417 Chathoth, K., Martin, B., Cornelis, P., Yvenou, S., Bonnaure-Mallet, M., and Baysse, C. (2020).  
418 The events that may contribute to subgingival dysbiosis: a focus on the interplay between iron,  
419 sulfide and oxygen. *FEMS Microbiol Lett* 367(14). DOI: 10.1093/femsle/fnaa100.

- 420 Chen, C.C., Teng, L.J., and Chang, T.C. (2004). Identification of Clinically Relevant Viridans  
421 Group *Streptococci* by Sequence Analysis of the 16S-23S Ribosomal DNA Spacer Region. *J Clin*  
422 *Microbiol* *42*, 2651–2657. DOI: 10.1128/JCM.42.6.2651-2657.2004.
- 423 Cunha, E.J., Auersvald, C.M., Deliberador, T.M., Gonzaga, C.C., Esteban Florez, F.L., Correr,  
424 G.M., and Storrer, C.L.M. (2019). Effects of Active Oxygen Toothpaste in Supragingival Biofilm  
425 Reduction: A Randomized Controlled Clinical Trial. *Int J Dent*. 2019:3938214. DOI:  
426 10.1155/2019/3938214.
- 427 Deliberador, T.M., Weiss, S.G., Rychuv, F., Cordeiro, G., Cate, M.C.L.T., Leonardi, L.,  
428 Brancher, J.A., and Scariot, R. (2020). Comparative Analysis *in Vitro* of the Application of  
429 blue<sup>®</sup>m Oral Gel versus Chlorhexidine on *Porphyromonas gingivalis*: A Pilot Study. *AiM* *10*,  
430 194–201. DOI: 10.4236/aim.2020.104015.
- 431 Eick, S., Renatus, A., Heinicke, M., Pfister, W., Stratul, S.-I., and Jentsch, H. (2013). Hyaluronic  
432 Acid as an Adjunct After Scaling and Root Planing: A Prospective Randomized Clinical Trial. *J*  
433 *Periodontol.* *84*, 941–949. DOI: 10.1902/jop.2012.120269.
- 434 Esposito, E., Carotta, V., Scabbia, A., Trombelli, L., D’Antona, P., Menegatti, E., and Nastruzzi,  
435 C. (1996). Comparative analysis of tetracycline-containing dental gels: Poloxamer- and  
436 monoglyceride-based formulations. *Int. J. Pharm.* *142*, 9–23. [https://doi.org/10.1016/0378-](https://doi.org/10.1016/0378-5173(96)04649-2)  
437 [5173\(96\)04649-2](https://doi.org/10.1016/0378-5173(96)04649-2).
- 438 Figueiredo de Almeida Gomes, B.P., Vianna, M.E., Sena, N.T., Zaia, A.A., Ferraz, C.C.R., and  
439 de Souza Filho, F.J. (2006). In vitro evaluation of the antimicrobial activity of calcium hydroxide  
440 combined with chlorhexidine gel used as intracanal medicament. *Oral Surg Oral Med Oral Pathol*  
441 *Oral Radiol Endod.* *102*, 544–550. DOI: 10.1016/j.tripleo.2006.04.010.
- 442 Goeres, D.M., Loetterle, L.R., Hamilton, M.A., Murga, R., Kirby, D.W., and Donlan, R.M.  
443 (2005). Statistical assessment of a laboratory method for growing biofilms. *Microbiology* *151*,  
444 757–762. DOI: 10.1099/mic.0.27709-0.
- 445 Graça, M.A., Watts, T.L.P., Wilson, R.F., and Palmer, R.M. (1997). A randomized controlled  
446 trial of a 2% minocycline gel as an adjunct to non-surgical periodontal treatment, using a design  
447 with multiple matching criteria. *J Clin Periodontol.* *24*, 249–253. DOI: 10.1111/j.1600-  
448 051x.1997.tb01838.x.
- 449 Graves, D.T., Corrêa, J.D., and Silva, T.A. (2019). The Oral Microbiota Is Modified by Systemic  
450 Diseases. *J Dent Res* *98*, 148–156. DOI: 10.1177/0022034518805739.
- 451 Hajishengallis, G., and Lamont, R.J. (2016). Dancing with the Stars: how Choreographed  
452 Bacterial Interactions Dictate Nososymbiocity and Give Rise to Keystone Pathogens, Accessory  
453 Pathogens, and Pathobionts. *Trends Microbiol* *24*, 477–489. DOI: 10.1016/j.tim.2016.02.010.
- 454 Harrison, J.J., Ceri, H., Yerly, J., Rabiei, M., Hu, Y., Martinuzzi, R., and Turner, R.J. (2007).  
455 Metal Ions May Suppress or Enhance Cellular Differentiation in *Candida albicans* and *Candida*  
456 *tropicalis* Biofilms. *Appl. Environ. Microbiol.* *73*, 4940–4949. DOI: 10.1128/AEM.02711-06.

- 457 Harrison, J.J., Stremick, C.A., Turner, R.J., Allan, N.D., Olson, M.E., and Ceri, H. (2010).  
458 Microtiter susceptibility testing of microbes growing on peg lids: a miniaturized biofilm model  
459 for high-throughput screening. *Nat Protoc.* 5, 1236–1254. DOI: 10.1038/nprot.2010.71.
- 460 H R, R., Dhamecha, D., Jagwani, S., Patil, D., Hegde, S., Potdar, R., Metgud, R., Jalalpure, S.,  
461 Roy, S., Jadhav, K., Tiwari, N.K., Koduru, S., Hugar, S., Dodamani, S. (2017). Formulation of  
462 thermoreversible gel of cranberry juice concentrate: Evaluation, biocompatibility studies and its  
463 antimicrobial activity against periodontal pathogens. *Mater Sci Eng C Mater Biol Appl.* 75,  
464 1506–1514. DOI: 10.1016/j.msec.2017.03.054.
- 465 Hujoel, P.P., Drangsholt, M., Spiekerman, C., and Weiss, N.S. (2003). An Exploration of the  
466 Periodontitis–Cancer Association. *Annals of Epidemiology* 13, 312–316. DOI: 10.1016/s1047-  
467 2797(02)00425-8.
- 468 Hunter, M.C., Pozhitkov, A.E., and Noble, P.A. (2016). Microbial signatures of oral dysbiosis,  
469 periodontitis and edentulism revealed by Gene Meter methodology. *J Microbiol Methods.* 131,  
470 85–101. DOI: 10.1016/j.mimet.2016.09.019.
- 471 İkinci, G., Şenel, S., Akıncıbay, H., Kaş, S., Erciş, S., Wilson, C.G., and Hıncal, A.A. (2002).  
472 Effect of chitosan on a periodontal pathogen *Porphyromonas gingivalis*. *Int J Pharm.* 235, 121–  
473 127. DOI: 10.1016/s0378-5173(01)00974-7
- 474 Ito, R., Ishihara, K., Shoji, M., Nakayama, K., and Okuda, K. (2010). Hemagglutinin/Adhesin  
475 domains of *Porphyromonas gingivalis* play key roles in coaggregation with *Treponema*  
476 *denticola*. *FEMS Immunol Med Microbiol* 60, 251–260. DOI: 10.1111/j.1574-  
477 695X.2010.00737.x.
- 478 Kigure, T., Saito, A., Seida, K., Yamada, S., Ishihara, K., and Okuda, K. (1995). Distribution of  
479 *Porphyromonas gingivalis* and *Treponema denticola* in human subgingival plaque at different  
480 periodontal pocket depths examined by immunohistochemical methods. *J Periodontal Res.* 30,  
481 332–341. DOI: 10.1111/j.1600-0765.1995.tb01284.x.
- 482 Kolenbrander, P.E., Andersen, R.N., Blehert, D.S., Egland, P.G., Foster, J.S., and Palmer, R.J.  
483 (2002). Communication among Oral Bacteria. *Microbiol Mol Biol Rev.* 66, 486–505. DOI:  
484 10.1128/mmbr.66.3.486-505.2002.
- 485 Koziel, J., Mydel, P., and Potempa, J. (2014). The Link Between Periodontal Disease and  
486 Rheumatoid Arthritis: An Updated Review. *Curr Rheumatol Rep* 16. DOI: 10.1007/s11926-014-  
487 0408-9.
- 488 Kumawat, R.M., Ganvir, S.M., Hazarey, V.K., Qureshi, A., and Purohit, H.J. (2016). Detection  
489 of *Porphyromonas gingivalis* and *Treponema denticola* in chronic and aggressive periodontitis  
490 patients: A comparative polymerase chain reaction study. *Contemp Clin Dent* 7, 481–486. DOI:  
491 10.4103/0976-237X.194097.
- 492 Lamont, R.J., and Hajishengallis, G. (2015). Polymicrobial synergy and dysbiosis in  
493 inflammatory disease. *Trends Mol Med.* 21, 172–183. DOI: 10.1016/j.molmed.2014.11.004.



- 494 Lee, C.-H., Kho, H.-S., Chung, S.-C., Lee, S.-W., and Kim, Y.-K. (2003). The relationship  
495 between volatile sulfur compounds and major halitosis-inducing factors. *J. Periodontol.* 74, 32–  
496 37. DOI: 10.1902/jop.2003.74.1.32.
- 497 Leschine, S.B., and Canale-Parola, E. (1980). Rifampin as a Selective Agent for Isolation of Oral  
498 Spirochetes. *J Clin Microbiol.*, 12(6):792-5. DOI: 10.1128/JCM.12.6.792-795.1980.
- 499 López, R. (2008). Periodontal disease and adverse pregnancy outcomes. *Evid Based Dent.* 9, 48.  
500 DOI: 10.1038/sj.ebd.6400581.
- 501 Martin, B., Tamanai-Shacoori, Z., Bronsard, J., Ginguené, F., Meuric, V., Mahé, F., and  
502 Bonnaure-Mallet, M. (2017). A new mathematical model of bacterial interactions in two-species  
503 oral biofilms. *PLoS ONE* 12, e0173153. DOI: 10.1371/journal.pone.0173153.
- 504 Martin, B., Chathoth, K., Ouali, S., Meuric, V., Bonnaure-Mallet, M., and Baysse, C. (2018).  
505 New growth media for oral bacteria. *J Microbiol Methods.* 153, 10–13. DOI:  
506 10.1016/j.mimet.2018.08.013.
- 507 Martineau, L., and Dosch, H.-M. (2007). Biofilm reduction by a new burn gel that targets  
508 nociception. *J Appl Microbiol.* 103, 297–304. DOI: 10.1111/j.1365-2672.2006.03249.x.
- 509 Meuric, V., Martin, B., Guyodo, H., Rouillon, A., Tamanai-Shacoori, Z., Barloy-Hubler, F.,  
510 and Bonnaure-Mallet, M. (2013). *Treponema denticola* improves adhesive capacities of  
511 *Porphyromonas gingivalis*. *Mol Oral Microbiol* 28, 40–53. DOI: 10.1111/omi.12004.
- 512 Meuric, V., Le Gall-David, S., Boyer, E., Acuña-Amador, L., Martin, B., Fong, S.B., Barloy-  
513 Hubler, F., and Bonnaure-Mallet, M. (2017). Signature of Microbial Dysbiosis in Periodontitis.  
514 *Appl. Environ. Microbiol.* 83. DOI: 10.1128/AEM.00462-17.
- 515 Neuman, M.G., Nanau, R.M., Oruña-Sanchez, L., and Coto, G. (2015). Hyaluronic Acid and  
516 Wound Healing. *J Pharm Pharm Sci.* 18, 53–60. DOI: 10.18433/j3k89d.
- 517 Ng, H.M., Slakeski, N., Butler, C.A., Veith, P.D., Chen, Y.-Y., Liu, S.W., Hoffmann, B.,  
518 Dashper, S.G., and Reynolds, E.C. (2019). The Role of *Treponema denticola* Motility in  
519 Synergistic Biofilm Formation with *Porphyromonas gingivalis*. *Front. Cell. Infect. Microbiol.* 9.  
520 DOI: 10.3389/fcimb.2019.00432.
- 521 Noda, T., Okuda, T., Mizuno, R., Ozeki, T., and Okamoto, H. (2018). Two-Step Sustained-  
522 Release PLGA/Hyaluronic Acid Gel Formulation for Intra-articular Administration. *Biol Pharm*  
523 *Bull.* 41, 937–943. DOI: 10.1248/bpb.b18-00091.
- 524 Noyan, Ü., Yilmaz, S., Kuru, B., Kadir, T., Acar, O., and Büget, E. (1997). A clinical and  
525 microbiological evaluation of systemic and local metronidazole delivery in adult periodontitis  
526 patients. *J Clin Periodontol.* 24, 158–165. DOI: 10.1111/j.1600-051x.1997.tb00485.x.
- 527 Paquette, D.W., Waters, G.S., Stefanidou, V.L., Lawrence, H.P., Friden, P.M., O'Connor, S.M.,  
528 Sperati, J.D., Oppenheim, F.G., Hutchens, L.H., and Williams, R.C. (1997). Inhibition of

- 529 experimental gingivitis in beagle dogs with topical salivary histatins. *J Clin Periodontol.* 24, 216–  
530 222. DOI: 10.1111/j.1600-051x.1997.tb01834.x.
- 531 Petersen, P.E., and Ogawa, H. (2012). The global burden of periodontal disease: towards  
532 integration with chronic disease prevention and control: Global periodontal health. *Periodontol*  
533 2000. 60, 15–39. DOI: 10.1111/j.1600-0757.2011.00425.x.
- 534 Pihlstrom, B.L., Michalowicz, B.S., and Johnson, N.W. (2005). Periodontal diseases. *Lancet* 366,  
535 1809–1820. DOI: 10.1016/S0140-6736(05)67728-8.
- 536 Pirnazar, P., Wolinsky, L., Nachnani, S., Haake, S., Piloni, A., and Bernard, G.W. (1999).  
537 Bacteriostatic Effects of Hyaluronic Acid. *J Periodontol.* 70, 370–374. DOI:  
538 10.1902/jop.1999.70.4.370.
- 539 Pöllänen, M.T., Paino, A., and Ihalin, R. (2013). Environmental Stimuli Shape Biofilm  
540 Formation and the Virulence of Periodontal Pathogens. *Int J Mol Sci* 14, 17221–17237. DOI:  
541 10.3390/ijms140817221.
- 542 Preshaw, P.M., Alba, A.L., Herrera, D., Jepsen, S., Konstantinidis, A., Makrilakis, K., and  
543 Taylor, R. (2012). Periodontitis and diabetes: a two-way relationship. *Diabetologia* 55, 21–31.  
544 DOI: 10.1007/s00125-011-2342-y.
- 545 Sakanaka, A., Kuboniwa, M., Takeuchi, H., Hashino, E., and Amano, A. (2015). Arginine-  
546 Ornithine Antiporter ArcD Controls Arginine Metabolism and Interspecies Biofilm Development  
547 of *Streptococcus gordonii*. *J. Biol. Chem.* 290, 21185–21198. DOI: 10.1074/jbc.M115.644401.
- 548 Santos, R., Gomes, D., Macedo, H., Barros, D., Tibério, C., Veiga, A.S., Tavares, L., Castanho,  
549 M., and Oliveira, M. (2016). Guar gum as a new antimicrobial peptide delivery system against  
550 diabetic foot ulcers *Staphylococcus aureus* isolates. *J Med Microbiol.* 65, 1092–1099. DOI:  
551 10.1099/jmm.0.000329.
- 552 Sauvêtre, E., Glupczynsky, Y., Labbé, M., Yourassowsky, E., Sauvêtre, E., and Pourtois, M.  
553 (1993). The effect of clindamycin gel insert in periodontal pockets, as observed on smears and  
554 cultures. *Infection* 21, 245–247. DOI: 10.1007/BF01728900.
- 555 Tan, K.H., Seers, C.A., Dashper, S.G., Mitchell, H.L., Pyke, J.S., Meuric, V., Slakeski, N., Cleal,  
556 S.M., Chambers, J.L., McConville, M.J., Reynolds, E.C. (2014). *Porphyromonas gingivalis* and  
557 *Treponema denticola* Exhibit Metabolic Symbioses. *PLoS Pathog.* 10, e1003955. DOI:  
558 10.1371/journal.ppat.1003955.
- 559 Wang, B., Timilsena, Y.P., Blanch, E., and Adhikari, B. (2019). Lactoferrin: Structure, function,  
560 denaturation and digestion. *Crit Rev Food Sci Nutr.* 59, 580–596. DOI:  
561 10.1080/10408398.2017.1381583.
- 562 Watanabe, T., Maruyama, F., Nozawa, T., Aoki, A., Okano, S., Shibata, Y., Oshima, K.,  
563 Kurokawa, K., Hattori, M., Nakagawa, I., and Abiko, Y. (2011). Complete Genome Sequence of  
564 the Bacterium *Porphyromonas gingivalis* TDC60, Which Causes Periodontal Disease. *J Bacteriol*  
565 193, 4259–4260. DOI: 10.1128/JB.05269-11.

566 Yaegaki, K. (2008). Oral malodorous compounds are periodontally pathogenic and carcinogenic.  
567 Japanese Dental Science Review 44, 100–108. <https://doi.org/10.1016/j.jdsr.2008.06.003>.

568 Zhu, Y., Dashper, S.G., Chen, Y.-Y., Crawford, S., Slakeski, N., and Reynolds, E.C. (2013).  
569 *Porphyromonas gingivalis* and *Treponema denticola* Synergistic Polymicrobial Biofilm  
570 Development. PLoS ONE 8, e71727. DOI: 10.1371/journal.pone.0071727.

571

## 572 **FIGURE LEGENDS:**

573 **Figure 1: The process of testing antimicrobial gels on oral biofilms established on the**  
574 **surface of the pegs of the Calgary Biofilm Device.** (see methods)

575 **Figure 2: Representative microscopic images of the three-species oral biofilm on the surface**  
576 **of the pegs.** Post 1-hour treatment (with MMBC-3, Hyalugel<sup>®</sup>-ADO or blue<sup>®</sup>m oral gel) of the 6-  
577 hour biofilms on the surface of the pegs, the pegs were incubated in MMBC-3 for 24 hours. The  
578 pegs were further broken from the lid using pliers and stained using Styo<sup>®</sup>9. The stained pegs  
579 were visualized using the Leica TCS-SP5 confocal laser scanning microscope. To compare  
580 between the three treatments, maximum z-production of the Z stack were taken using 10X oil  
581 immersion objective lens and numerical zoom of 2: (A), (B), (C). Magnified images were  
582 captured using the 63X oil immersion objective lens, numerical zoom of 5.05: (D), (E), (F).

583 **Figure 3: qPCR quantification of the number of bacteria (CFU/ml) in the biofilm (collected**  
584 **from the pegs) and in planktonic form (collected from the 96-well microtiter plate).** The 6-  
585 hour three-species biofilm on the pegs were subjected to MMBC-3 or Hyalugel<sup>®</sup>-ADO or blue<sup>®</sup>m  
586 oral gel for 1 hour and further incubated in MMBC-3 for 24 hours. The planktonic cells were  
587 collected from the 96-well plate while the biofilm was collected from the pegs and quantified.  
588 (A) Total concentration (CFU/ml) of bacteria (planktonic/detached + biofilm), bacteria in biofilm  
589 and bacteria detached or in planktonic form after each treatment. (B) Concentration of each  
590 species in the biofilm after each treatment. (C) Concentration of each species in planktonic/  
591 detached cells for each treatment. p-value < 0.05 = \*, p-value < 0.01 = \*\*, p-value < 0.001 = \*\*\*

592 **Figure 4: Composition of each species in the biofilms and in the detached/planktonic form**  
593 **post-treatment.** Percentage of each species (*S. gordonii*, *P. gingivalis*, *T. denticola*) in the  
594 biofilms (A) and in the detached/planktonic form (B) after treatment with either Hyalugel<sup>®</sup>-ADO  
595 (grey bars) or blue<sup>®</sup>m oral gel (blue bars) in comparison to MMBC-3 (orange bars). The

596 percentage of each species is mentioned above respective bars. 100% stands for the sum of the  
597 percentages of the three species either in the biofilm or the detached (or planktonic) form.

598

599

600

601

602

603

604

605

606

607

608

609

610

611

612

613

614

615

616

617

618

619 **Table 1: Species-specific primer sequences used in this study**

| Organism                        | Sequence (5'→3')              |
|---------------------------------|-------------------------------|
| <i>Streptococcus gordonii</i>   | F: AAG-CAA-CGC-GAA-GAA-CCT-TA |
|                                 | R: GTC-TCG-CTA-GAG-TGC-CCA-AC |
| <i>Porphyromonas gingivalis</i> | F: TGG-GTT-TAA-AGG-GTG-CGT-AG |
|                                 | R: CAA-TCG-GAG-TTC-CTC-GTG-AT |
| <i>Treponema denticola</i>      | F: CGC-GTC-CCA-TTA-GCT-AGT-TG |
|                                 | R: TTC-TTC-ATT-CAC-ACG-GCG-TC |

620

621

622

623

624

625

626

627

628

629

630

631

632

633

634

635 **Table 2: Species-wise percentage of biofilm and detached (or planktonic) cells post-**  
 636 **treatment with either Hyalugel<sup>®</sup>-ADO or blue<sup>®</sup>m oral gel in comparison to MMBC-3.**

637

|                      | MMBC-3      |                                    | Hyalugel <sup>®</sup> -ADO |                                    | blue <sup>®</sup> m oral gel |                                    |
|----------------------|-------------|------------------------------------|----------------------------|------------------------------------|------------------------------|------------------------------------|
|                      | % biofilm   | % detached/<br>planktonic<br>cells | % biofilm                  | % detached/<br>planktonic<br>cells | % biofilm                    | % detached/<br>planktonic<br>cells |
| <i>S. gordonii</i>   | 0.4 ± 0.2   | 99.6 ± 0.2                         | 15.2 ± 9.1                 | 84.8 ± 9.1                         | 3.5 ± 1.9                    | 96.5 ± 1.9                         |
| <i>P. gingivalis</i> | 35.0 ± 13.9 | 65.0 ± 13.9                        | 51.6 ± 22.8                | 48.4 ± 22.8                        | 1.2 ± 1.1                    | 98.8 ± 1.1                         |
| <i>T. denticola</i>  | 12.8 ± 3.6  | 87.2 ± 3.6                         | 5.7 ± 4.1                  | 94.3 ± 4.1                         | 0.7 ± 0.4                    | 99.3 ± 0.4                         |

638 100% stands for the sum of the percentages of bacteria in the biofilm and the detached (or  
 639 planktonic) form.

640 % Calculation:

641 Percentages of bacteria in the biofilm:

$$642 \left[ \frac{\left(\frac{CFU}{ml} * total\ volume\ of\ sample\ recovered\ from\ pegs\right)}{\left(\frac{CFU}{ml} * total\ volume\ in\ wells\right) + \left(\frac{CFU}{ml} * total\ volume\ of\ sample\ recovered\ from\ pegs\right)} \right] * 100$$

643

644 Percentages of bacteria in the detached (or planktonic) form:

$$645 \left[ \frac{\left(\frac{CFU}{ml} * total\ volume\ in\ wells\right)}{\left(\frac{CFU}{ml} * total\ volume\ of\ sample\ recovered\ from\ pegs\right) + \left(\frac{CFU}{ml} * total\ volume\ in\ wells\right)} \right] * 100$$

646

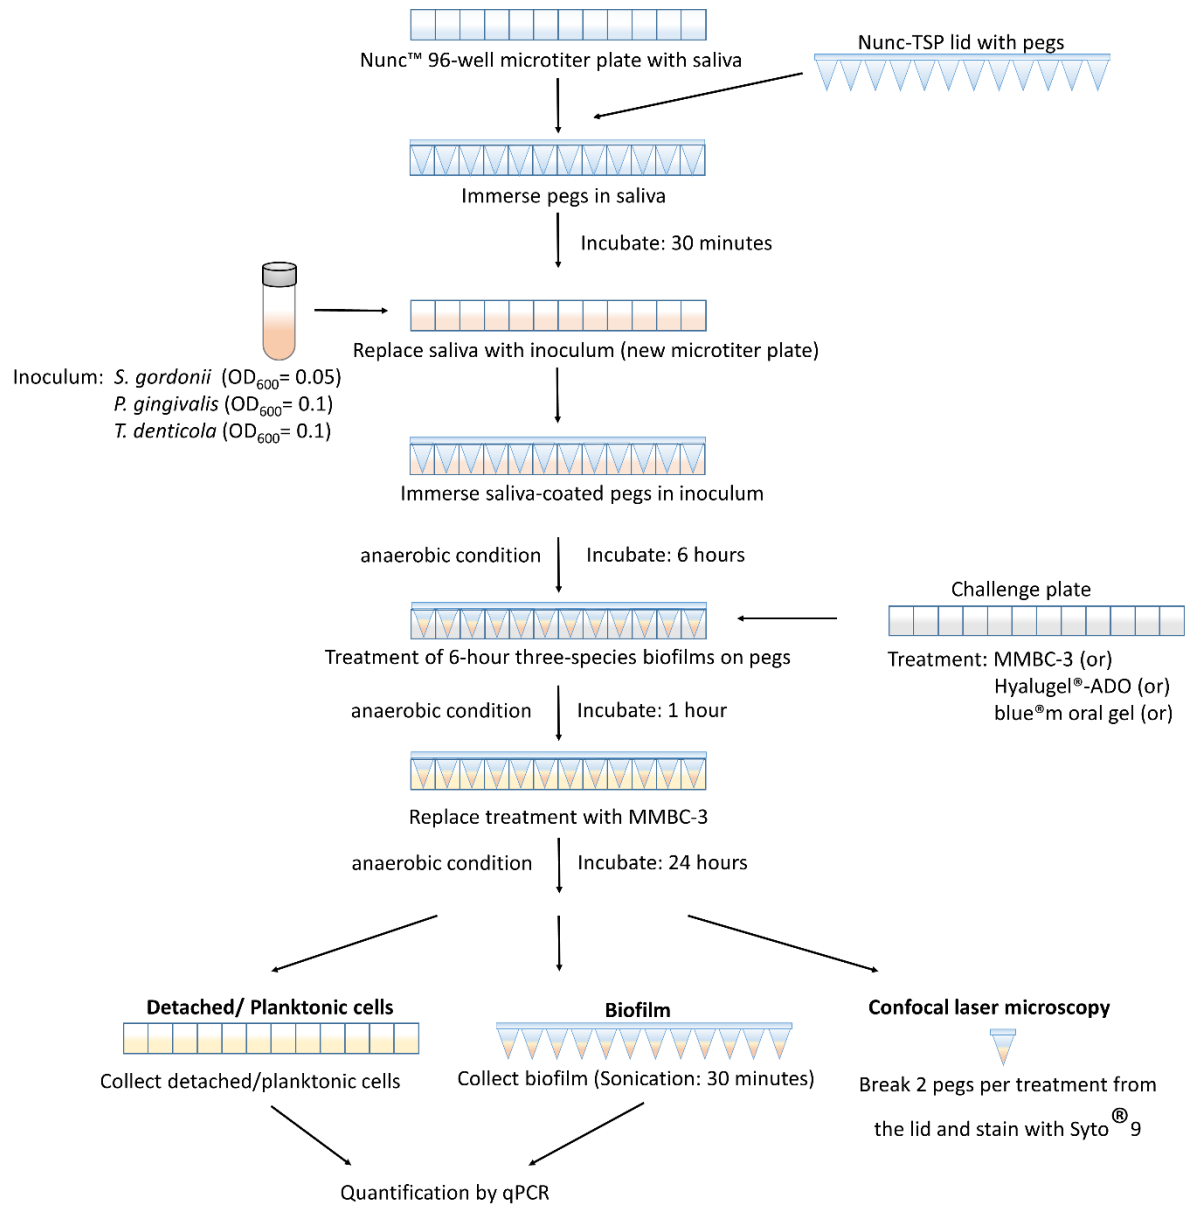

Figure 1

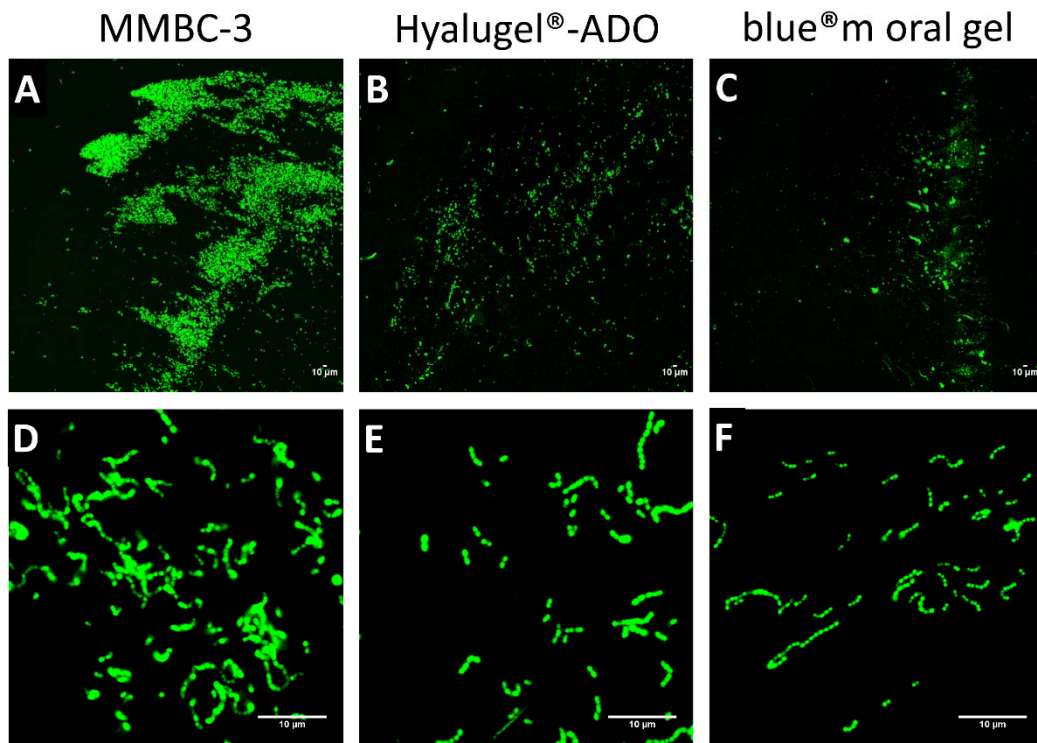

Figure 2



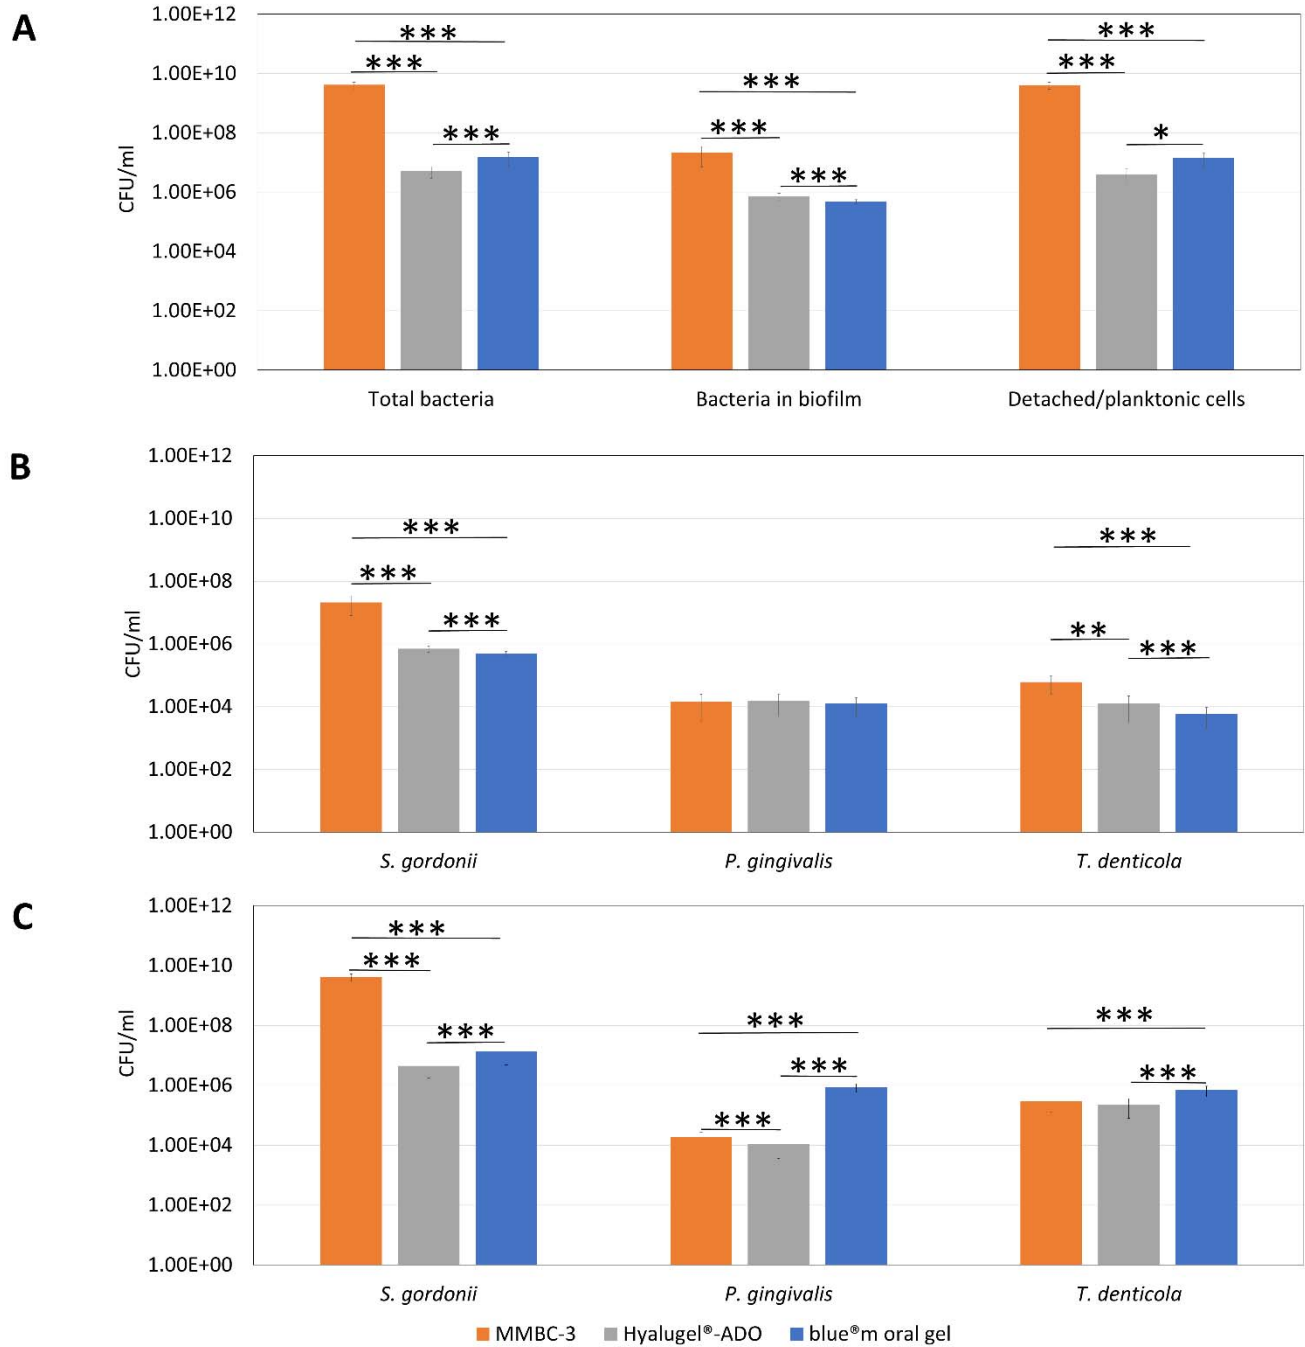

Figure 3

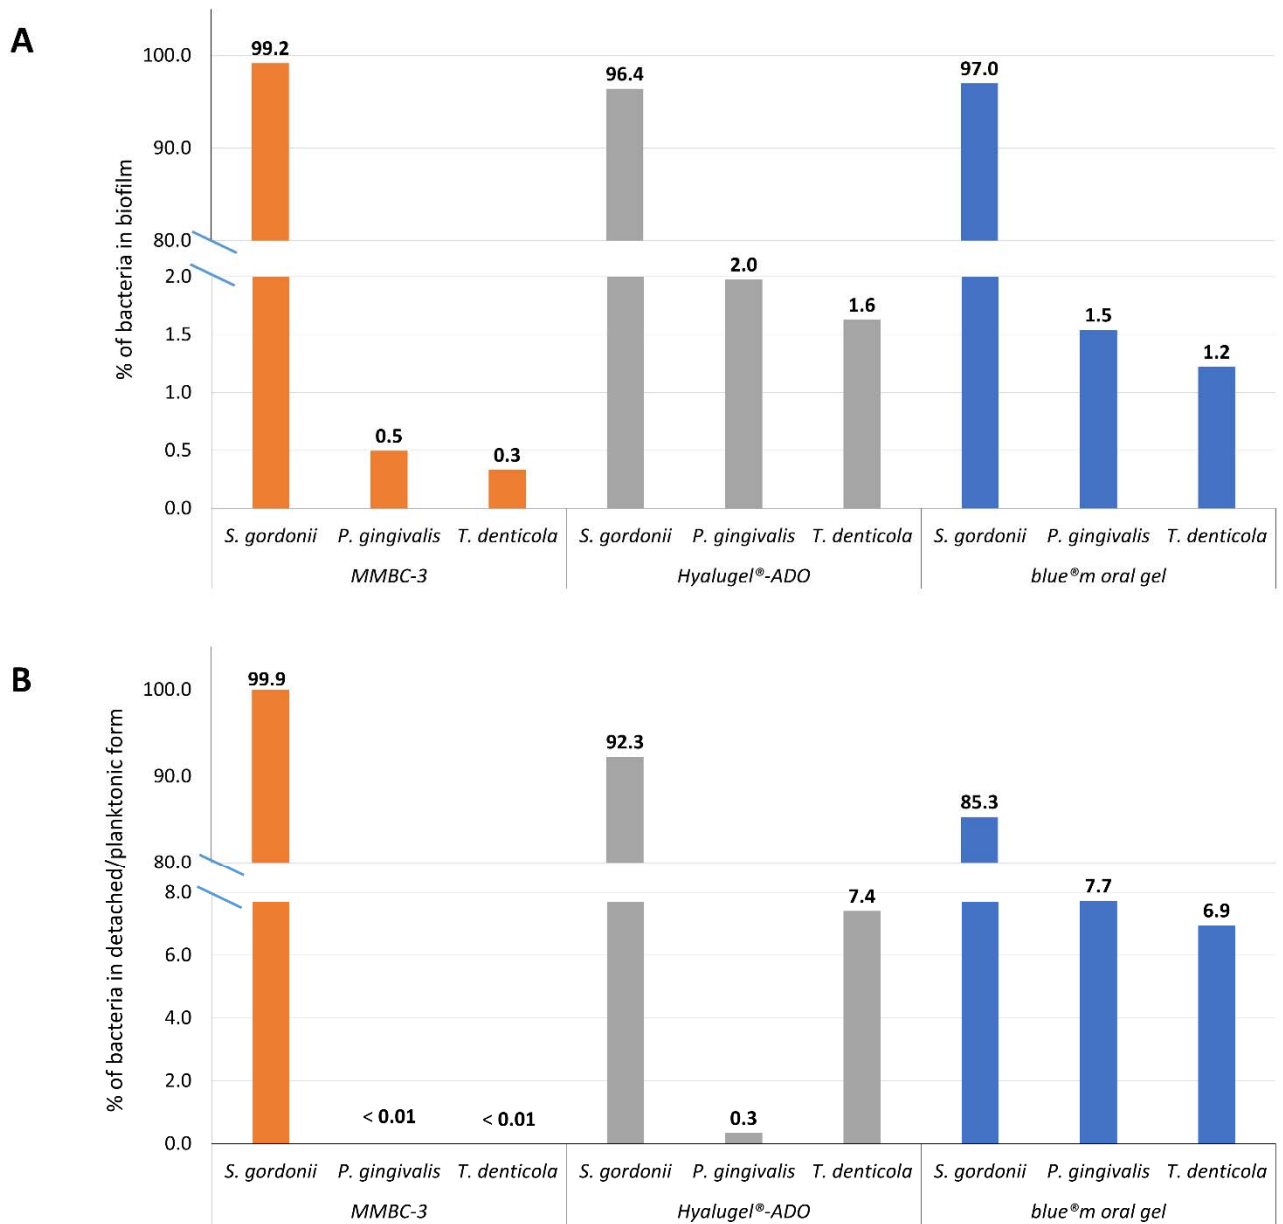

Figure 4
